# Supplementary material for: Isolation and Characterization of Efficient Active Compounds Using High-Performance Centrifugal Partition Chromatography (CPC) from Anti-Inflammatory Activity Fraction of Ecklonia maxima in South Africa
Source: MDPI journal article supplement (doi:10.3390/md20080471), 2022-07-23
Supplement: s1 [file s1]

## Supplementary data

### Isolation and characterization of efficient active compounds using high-performance centrifugal partition chromatography (CPC) from anti-inflammatory activity fraction of *Ecklonia maxima* in South Africa

#### Supplementary data

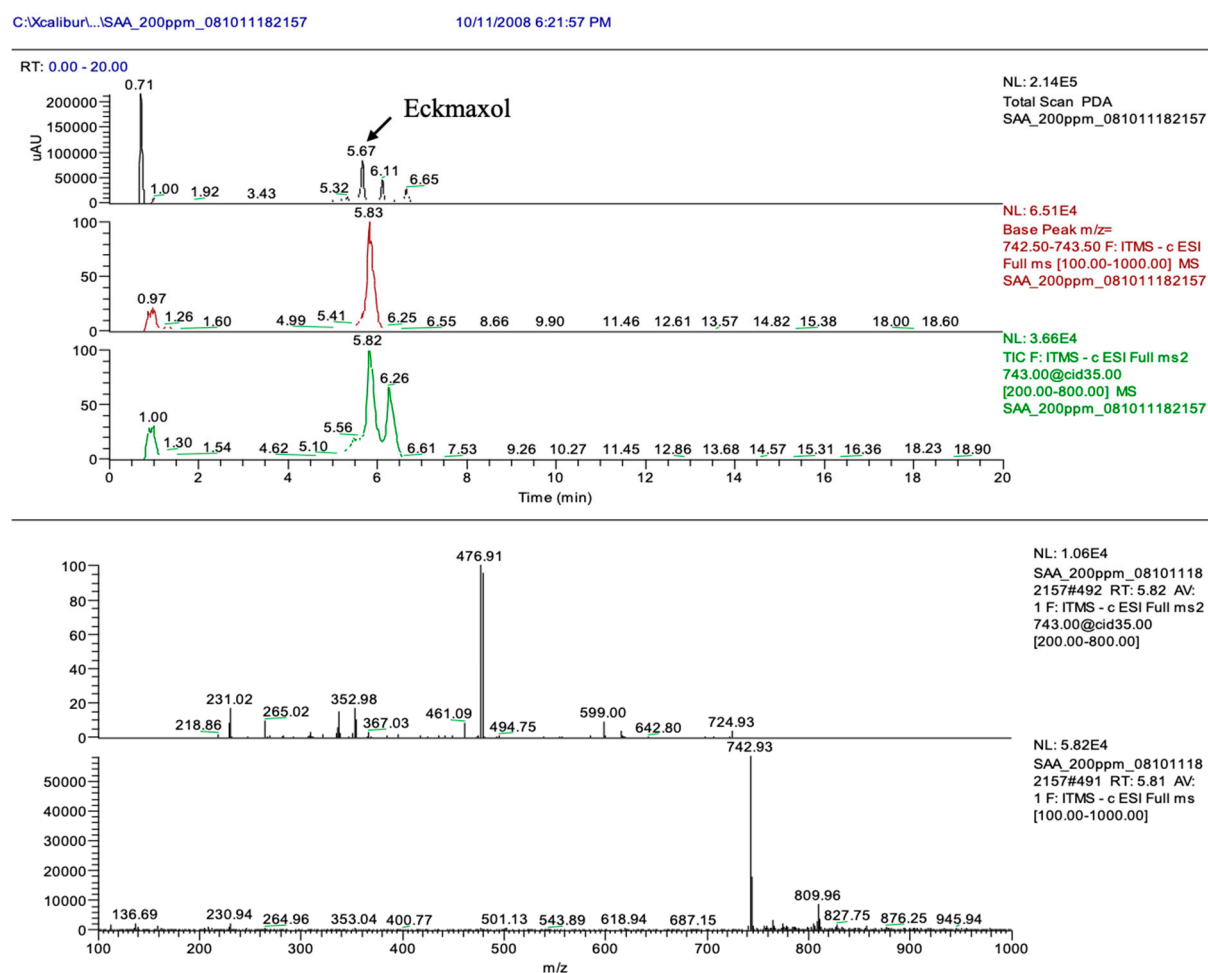

Supplemental Figure 1. LC/MSMS spectra (negative ion mode) of Eckmaxol

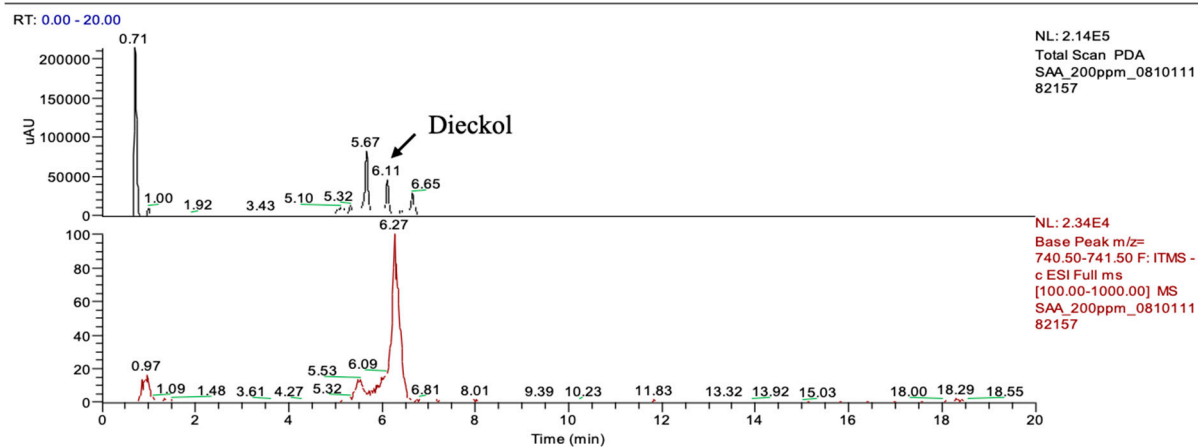

SAA\_200ppm\_081011182157 #537 RT: 6.25 AV: 1 NL: 1.90E4  
F: ITMS - c ESI Full ms [100.00-1000.00]

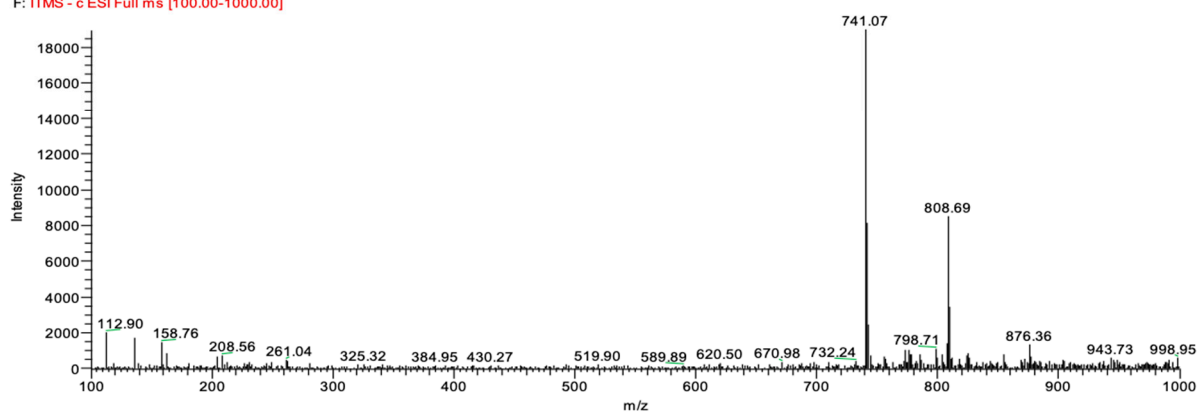

Supplemental Figure 2. LC/MSMS spectra (negative ion mode) of Dieckol

**(A) Eckmaxol**

| Pos. | $\delta$ H                       | $\delta$ C | Pos. | $\delta$ H                       | $\delta$ C |
|------|----------------------------------|------------|------|----------------------------------|------------|
| 1    |                                  | 124.8      | 19   |                                  | 157.1      |
| 2    |                                  | 151.3      | 20   | 5.93 (1H, d, $J = 2.4$ Hz, H-20) | 94.2       |
| 3    | 6.11 (1H, d, $J = 2.4$ Hz, H-3)  | 97.6       | 21   |                                  | 159.2      |
| 4    |                                  | 156.4      | 22   | 6.32 (1H, d, $J = 2.4$ Hz, H-22) | 98.7       |
| 5    | 5.86 (1H, d, $J = 2.4$ Hz, H-3)  | 94.7       | 23   |                                  | 143.3      |
| 6    |                                  | 154.4      | 24   |                                  | 102.0      |
| 7    |                                  | 123.5      | 25   |                                  | 101.8      |
| 8    |                                  | 137.7      | 26   |                                  | 156.1      |
| 9    |                                  | 143.5      | 27   | 6.20 (1H, d, $J = 2.0$ Hz, H-27) | 95.2       |
| 10   | 6.20 (1H, s, H-10)               | 98.9       | 28   |                                  | 159.3      |
| 11   |                                  | 146.3      | 29   | 6.28 (1H, d, $J = 2.0$ Hz, H-29) | 98.3       |
| 12   |                                  | 124.7      | 30   |                                  | 158.5      |
| 13   |                                  | 153.4      | 31   |                                  | 124.0      |
| 14   | 6.01 (1H, d, $J = 2.4$ Hz, H-14) | 99.3       | 32   |                                  | 151.6      |
| 15   |                                  | 158.7      | 33   | 6.03 (1H, s, H-33)               | 96.1       |
| 16   | 5.94 (1H, d, $J = 2.4$ Hz, H-16) | 95.2       | 34   |                                  | 156.1      |
| 17   |                                  | 146.7      | 35   | 6.03 (1H, s, H-35)               | 96.1       |
| 18   |                                  | 123.8      | 36   |                                  | 151.6      |

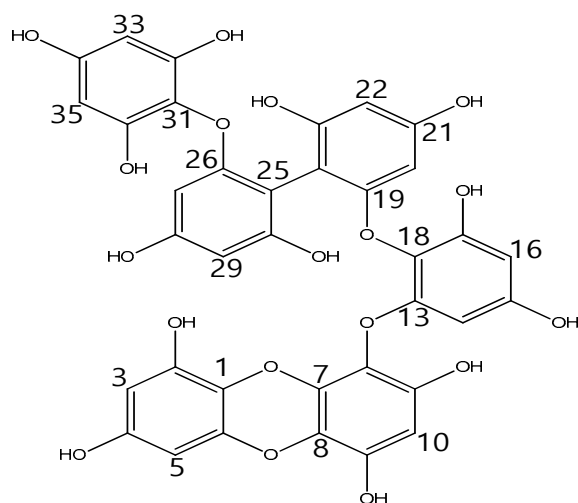

Chemical Formula:  $C_{36}H_{24}O_{18}$   
Molecular Weight: 744.56

**(B)**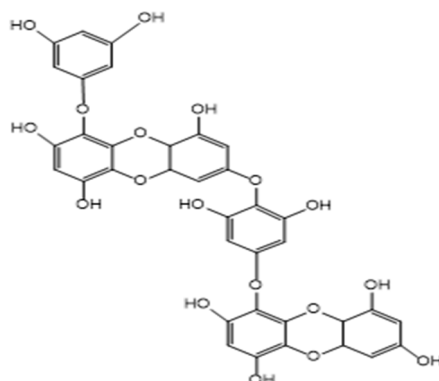

**Dieckkol:** amorphous powder,  $^1\text{H}$  NMR (400 MHz, methanol- $d_4$ )  $\delta$  6.15 (1H, s), 6.13 (1H, s), 6.09 (1H, d, 2.9 Hz), 6.06 (1H, d, 2.9 Hz), 6.05 (1H, d, 2.9 Hz), 5.98 (1H, d, 2.8 Hz), 5.95 (1H, d, 2.8 Hz), 5.92 (3H, m);  $^{13}\text{C}$  NMR (100 MHz, Methanol- $d_4$ )  $\delta$  161.8, 160.1, 157.8, 155.9, 154.5, 152.4, 147.3, 147.2, 147.1, 146.9, 144.3, 144.1, 143.4, 143.3, 138.6, 126.5,

126.2, 125.6, 125.5, 124.9, 124.6, 124.5, 99.9, 99.7, 99.5, 99.4, 97.6, 96.2, 95.8, 95.7, 95.3; FAB-MS  $m/z$  741  $[M]^-$ .

**Supplemental Figure 3.** NMR spectroscopic data of Eckmaxol [32] and Dieckol [44].

**(A)**

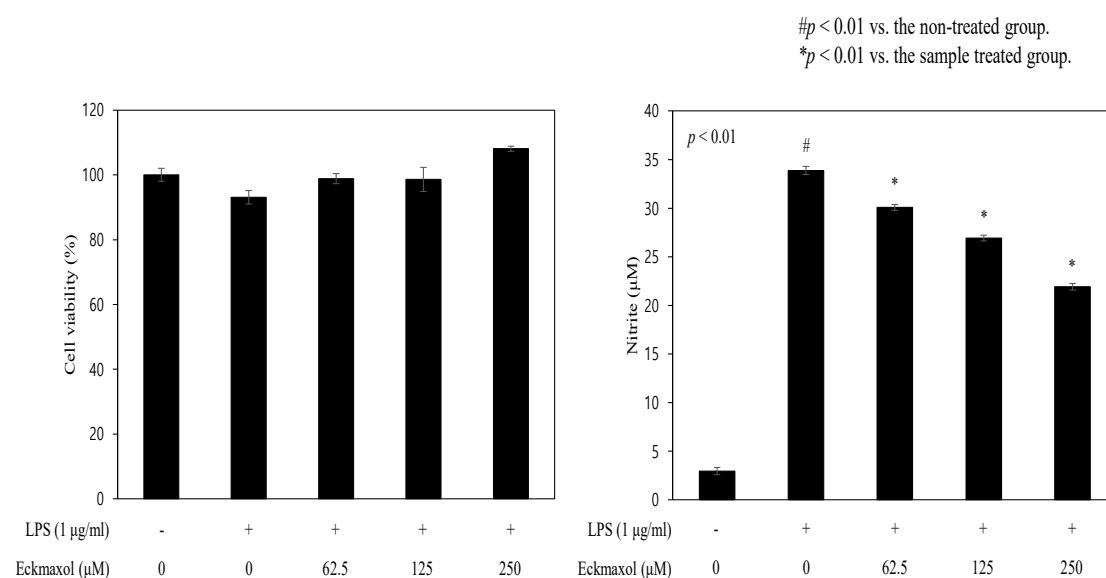

**(B)**

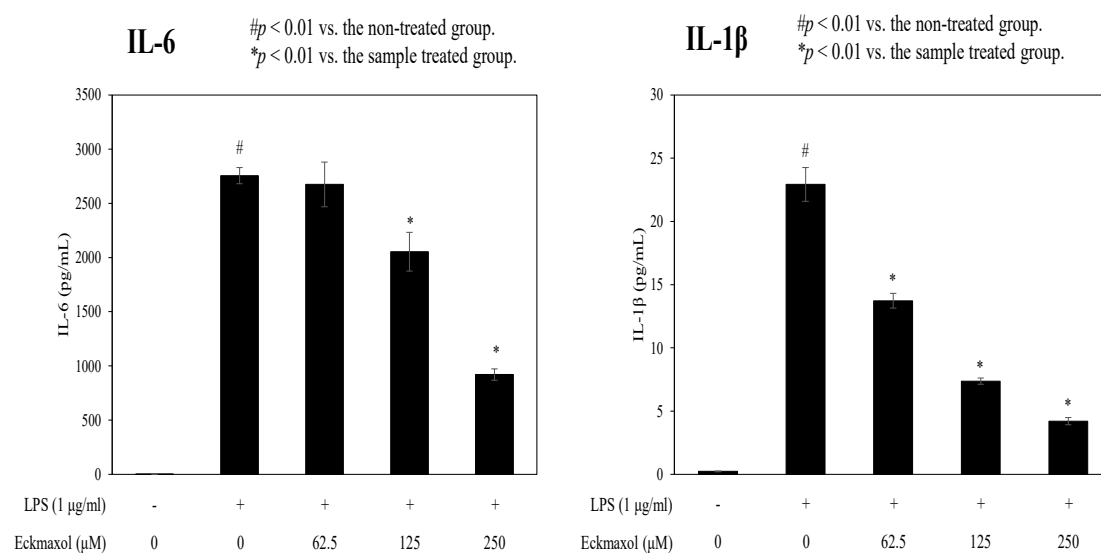

**Supplemental Figure 4.** Effect of Eckmaxol on inflammation response in LPS-induced RAW 264.7 cells. (A) Cell viability and NO production and (B) IL-6 and IL-1 $\beta$  of LPS-stimulated RAW 264.7 cells.

## Reference

- 32 Zhou X, Yi M, Ding L, He S, Yan X. Isolation and purification of neuroprotective phlorotannin from the marine Algae *Ecklonia maxima* by size exclusion and high-speed counter-current chromatography. *Marine drugs*. 2019, 17, 212.
- 44 Lee SH, Han JS, Heo SJ, Hwang JY, Jeon YJ. Protective effects of dieckol isolated from *Ecklonia cava* against high glucose-induced oxidative stress in human umbilical vein endothelial cells. *Toxicology in Vitro*. 2010, 24, 375–381.
